# Supplementary material for: Lung cancer diagnosis and staging with endobronchial ultrasound-guided transbronchial needle aspiration compared with conventional approaches: an open-label, pragmatic, randomised controlled trial
Source: PubMed Central journal article supplement (PMC4648022; doi:10.1016/s2213-2600(15)00029-6), 2015-04
Supplement: mmc1.pdf [file mmc1.pdf]

## Supplementary appendix

This appendix formed part of the original submission and has been peer reviewed. We post it as supplied by the authors.

Supplement to: Navani N, Nankivell M, Lawrence DR, et al, on behalf of the Lung-BOOST trial investigators. Lung cancer diagnosis and staging with endobronchial ultrasound-guided transbronchial needle aspiration compared with conventional approaches: an open-label, pragmatic, randomised controlled trial. *Lancet Respir Med* 2015; published online Feb 4. [http://dx.doi.org/10.1016/S2213-2600\(15\)00029-6](http://dx.doi.org/10.1016/S2213-2600(15)00029-6).

# **Appendix**

**Lung-BOOST trial**

**Navani et al.**

Figure S1: Conventional diagnosis and staging arm flowchart

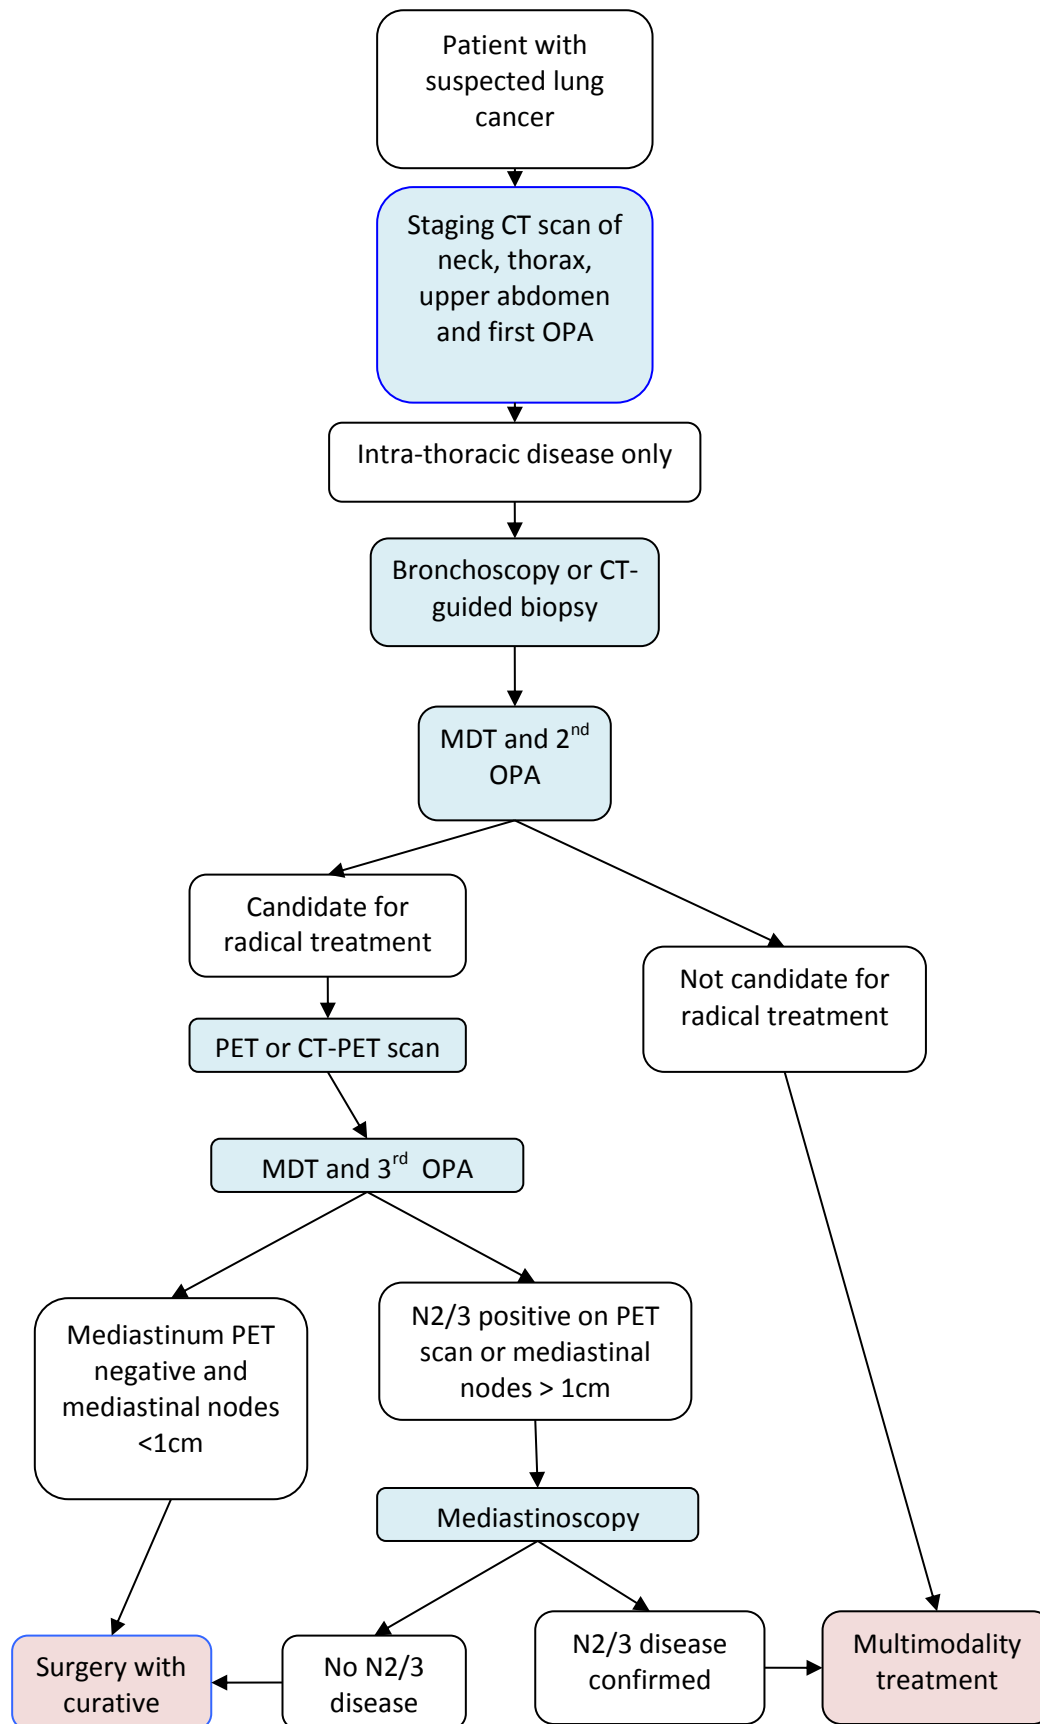

Patients in the conventional diagnosis and staging arm of the trial were recommended to undergo CT guided biopsy or bronchoscopy depending upon whether the primary lesion was peripheral or central. Conventional transbronchial needle aspiration was utilised at the operator's discretion. If the patient was a candidate for radical treatment, a PET-CT scan was recommended. Mediastinoscopy was advised if the presence of FDG avid lymph nodes precluded a radical treatment option. Invasive mediastinal sampling was also recommended in the trial protocol if any mediastinal lymph node was > 1cm in short axis and its result would alter management. However, the protocol did not mandate any specific investigations (other than the exclusion of EBUS-TBNA) and all investigations and their order, including the need for PET-CT scan and mediastinoscopy, were determined by the multi-disciplinary team.

Figure S2: EBUS arm flowchart

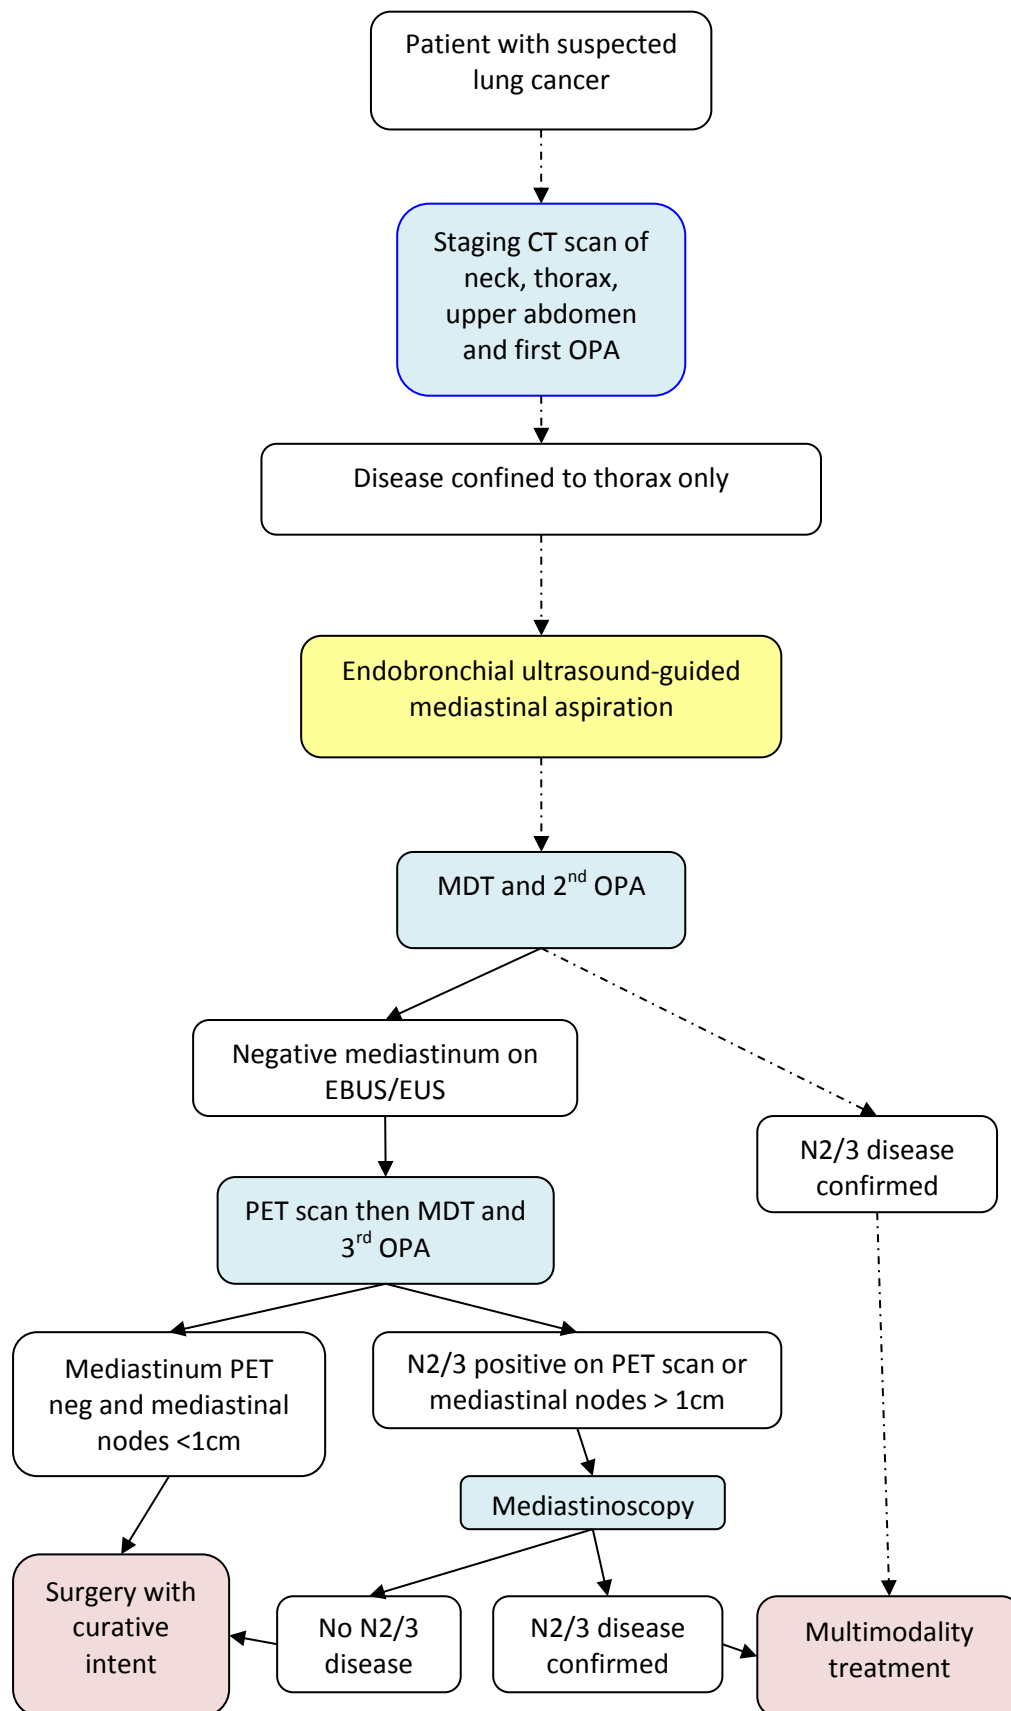

Patients in the EBUS arm of the trial were scheduled to undergo EBUS-TBNA as an initial investigation after staging CT scan. Standard videobronchoscopy was permitted as an additional investigation at the same sitting at the operator's discretion. Endoscopic ultrasound guided fine needle aspiration (EUS-FNA) was permitted as an alternative to EBUS-TBNA if a target lesion was not amenable to EBUS-TBNA. Three to 5 passes per lymph node were made. Rapid on-site evaluation of samples was not performed. Specimens obtained were smeared onto slides and also spun down for cell block analysis. Any cores obtained were transferred directly into formalin and subsequent histopathological examination. Samples from EBUS-TBNA underwent routine laboratory processing. Results from EBUS-TBNA were discussed in multi-disciplinary team meetings in the referring hospitals and further investigations were requested as required.

Figure S3: Lung-BOOST trial CONSORT diagram

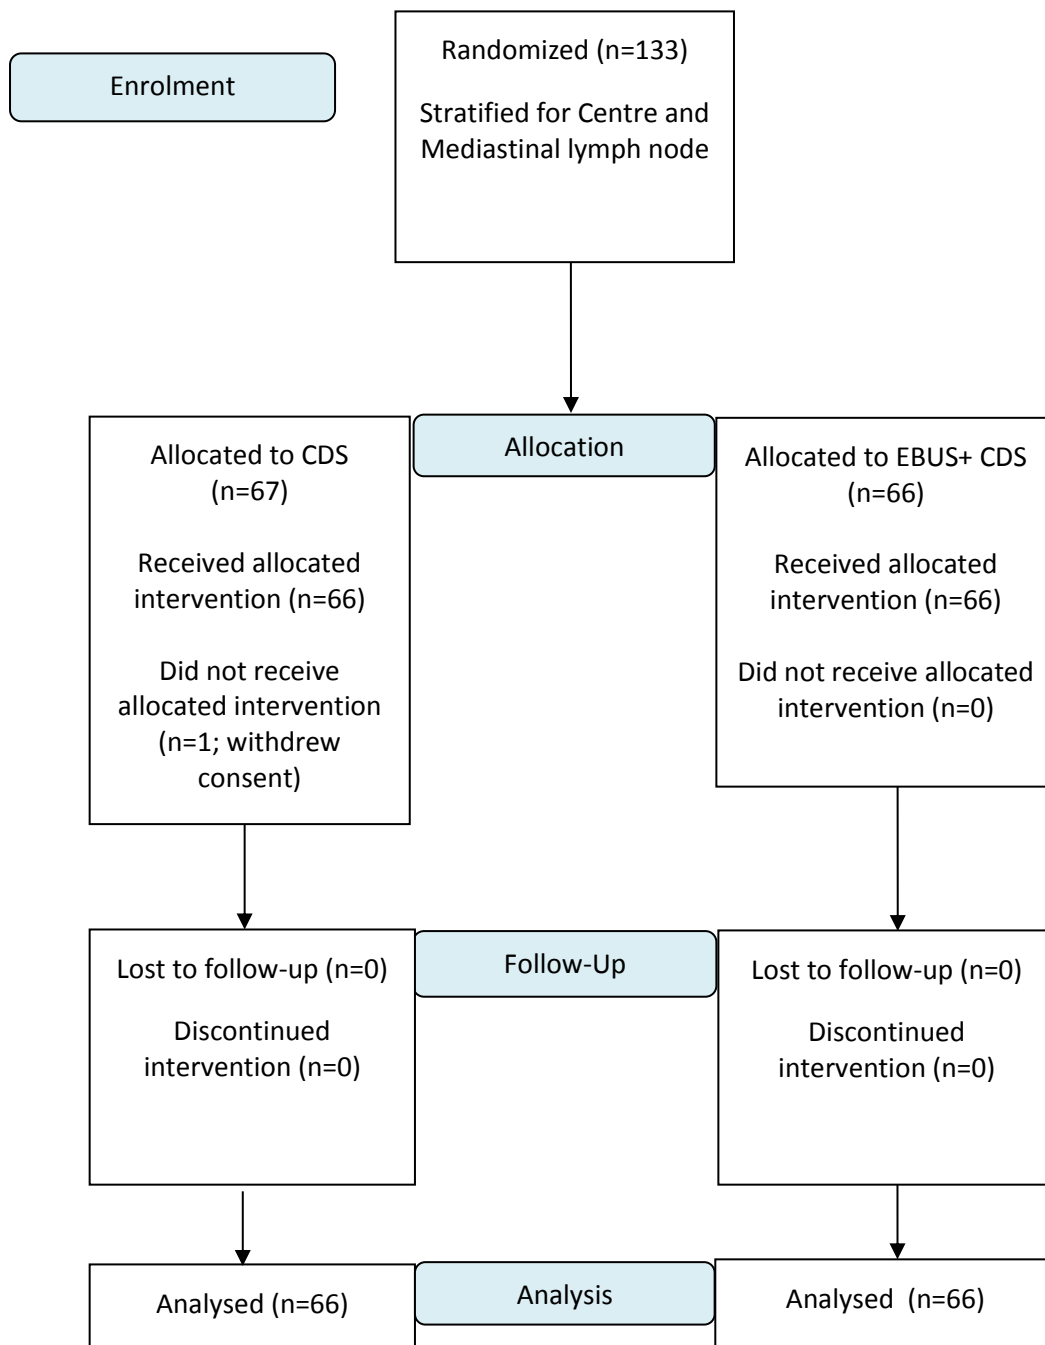

Figure S4: Exploratory analysis of non-small cell lung cancer survival according to treatment modality in the Lung-BOOST trial.

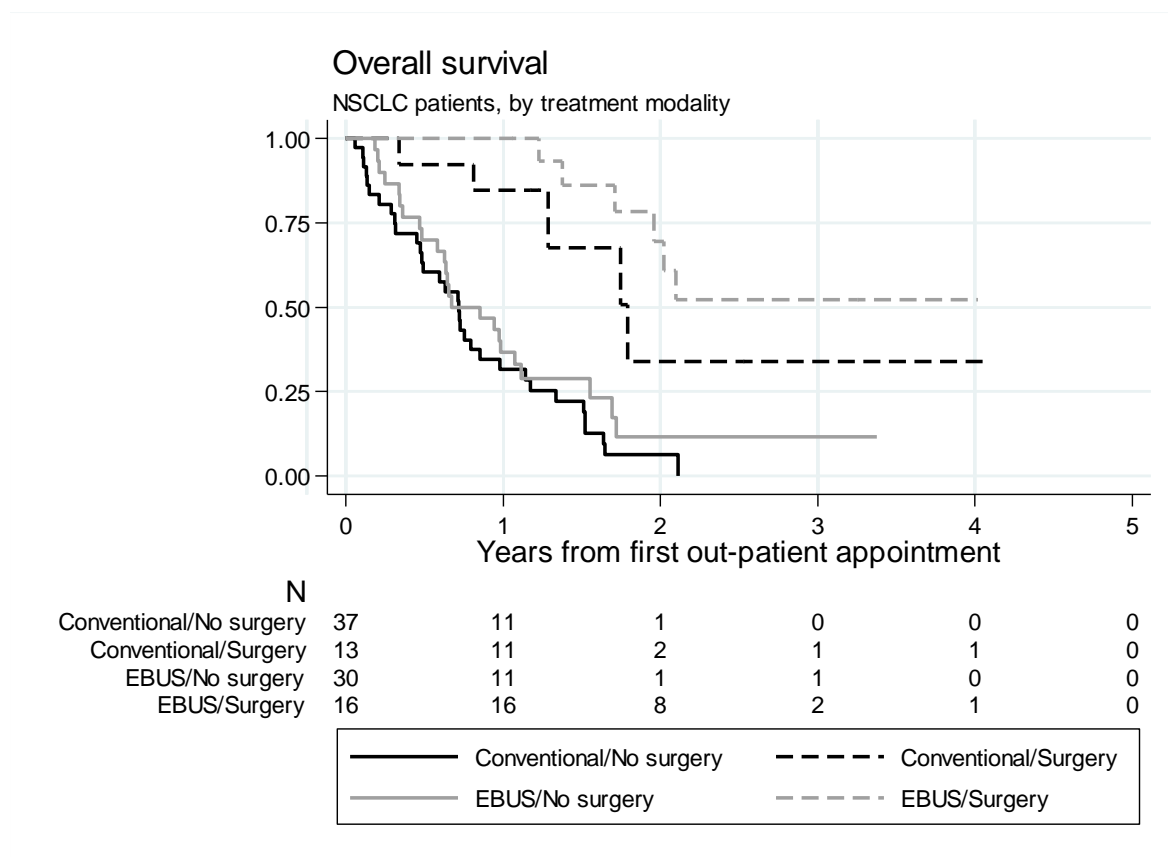

As expected, survival for patients with Stage I and II non-small cell lung cancer undergoing surgery is superior to those patients with more advanced stages not undergoing surgery. However, in patients undergoing surgery there is a trend towards improved survival in patients who have pre-operative EBUS compared to those patients who undergo conventional diagnosis and staging (HR 0.37 (0.10, 1.32), P=0.125). There also may be improved survival in patients undergoing EBUS followed by non-surgical treatments compared to patients undergoing conventional techniques followed by non-surgical treatments (HR 0.68 (0.41, 1.13), P=0.137). These potential differences in survival may reflect a more accurate staging resulting in patients receiving more appropriate and therefore effective therapy for their disease stage.



Table S1: Unnecessary thoracotomies

|                                  | Conventional diagnosis and staging (n=17 underwent thoracotomy) | EBUS-TBNA diagnosis and staging (n= 17 underwent thoracotomy) |
|----------------------------------|-----------------------------------------------------------------|---------------------------------------------------------------|
| Unnecessary thoracotomies        | 13 (76%)                                                        | 5 (29%)                                                       |
| Open and shut                    | 3                                                               | 0                                                             |
| Unexpected pN2 or pN3            | 0                                                               | 1                                                             |
| Unexpected pT4 or pM1a or b      | 3                                                               | 1                                                             |
| Benign disease                   | 3                                                               | 2                                                             |
| Disease recurrence within 1 year | 6                                                               | 3                                                             |
| Death within 1 year              | 1                                                               | 0                                                             |

Table S2: Costs of diagnosing and staging patients with suspected lung cancer (all patients). Unit costs were obtained from NHS Reference Costs, National Institute of Clinical Excellence 2011 Lung cancer guideline and a published study (9).

| Procedure               | Percentage of patients |                | Difference | Unit cost (£) | Mean cost per patient |             | Difference |
|-------------------------|------------------------|----------------|------------|---------------|-----------------------|-------------|------------|
|                         | EBUS arm (N=66)        | CDS arm (N=66) | p-value    |               | EBUS arm (£)          | CDS arm (£) | (£)        |
| Bronchoscopy            | 3%                     | 67%            | <0.001     | 589           | 17.85                 | 392.67      | -374.82    |
| Conventional TBNA       | 0%                     | 8%             | 0.023      | 162           | 0.00                  | 12.27       | -12.27     |
| Radiology guided biopsy | 8%                     | 44%            | <0.001     | 450           | 34.09                 | 197.73      | -163.64    |
| PET-CT scan             | 50%                    | 76%            | 0.002      | 843           | 421.50                | 638.64      | -217.14    |
| Mediastinoscopy         | 11%                    | 12%            | 0.784      | 3868          | 410.24                | 468.85      | -58.61     |
| Bone scan               | 0%                     | 3%             | 0.154      | 364           | 0.00                  | 11.03       | -11.03     |
| EBUS                    | 95%                    | 8%             | <0.001     | 1382          | 1319.18               | 104.70      | 1214.48    |
| EUS                     | 5%                     | 3%             | 0.648      | 800           | 36.36                 | 24.24       | 12.12      |
| Chest drain             | 2%                     | 2%             | 1.000      | 275           | 4.17                  | 4.17        | 0.00       |
| Other investigations    | 0%                     | 13%            | <0.001     |               |                       |             |            |
| VATS                    | 0%                     | 5%             |            | 3868          | 0.00                  | 175.82      | -175.82    |
| US liver                | 0%                     | 5%             |            | 64            | 0.00                  | 2.91        | -2.91      |
| MRI head                | 0%                     | 3%             |            | 216           | 0.00                  | 6.55        | -6.55      |

| Procedure                                     | Percentage of patients |                | Difference | Unit cost (£) | Mean cost per patient |                | Difference                      |
|-----------------------------------------------|------------------------|----------------|------------|---------------|-----------------------|----------------|---------------------------------|
|                                               | EBUS arm (N=66)        | CDS arm (N=66) | p-value    |               | EBUS arm (£)          | CDS arm (£)    | (£)                             |
| CT brain                                      | 0%                     | 3%             |            | 101           | 0.00                  | 3.06           | -3.06                           |
| MRI spine                                     | 0%                     | 2%             |            | 303           | 0.00                  | 4.59           | -4.59                           |
| Repeat Bronchoscopy                           | 0%                     | 2%             |            | 589           | 0.00                  | 8.92           | -8.92                           |
| Repeat Biopsy                                 | 0%                     | 2%             |            | 450           | 0.00                  | 6.82           | -6.82                           |
| Total outpatient appointments (after initial) | 103                    | 178            | <0.001     | 100           | 156.06                | 279.70         | -113.64                         |
| Average excess inpatient days                 | 0.03                   | 0.06           | 0.559      | 260           | 7.88                  | 15.76          | -7.88                           |
|                                               |                        |                |            |               |                       |                |                                 |
| <b>Total (diagnosis and staging)</b>          |                        |                |            |               | <b>2407.33</b>        | <b>2348.41</b> | <b>58.92 (95% CI -463, 581)</b> |

Table S3: Costs of initial treatment and overall costs of patients with non-small cell lung cancer. Unit costs were obtained from NHS Reference Costs and NICE 2011 Lung cancer guideline.

| Procedure                                       | Percentage of patients |                | Unit cost (£) | Mean cost per patient |             | Difference (£)         |
|-------------------------------------------------|------------------------|----------------|---------------|-----------------------|-------------|------------------------|
|                                                 | EBUS arm (N=46)        | CDS arm (N=49) |               | EBUS arm (£)          | CDS arm (£) |                        |
| Platinum doublet chemotherapy                   | 46%                    | 16%            | 4100          | 1871.74               | 669.39      | 1202.35                |
| Lobectomy                                       | 35%                    | 27%            | 5704          | 1984.00               | 1513.31     | 470.69                 |
| Radical radiotherapy                            | 4%                     | 14%            | 2840          | 123.48                | 405.71      | -282.24                |
| Chemo-radiation                                 | 2%                     | 10%            | 8770          | 190.65                | 894.90      | -704.25                |
| Palliative radiotherapy                         | 7%                     | 22%            | 1940          | 126.52                | 435.51      | -308.99                |
| Palliative care                                 | 7%                     | 10%            | 3581          | 233.54                | 365.41      | -131.86                |
|                                                 |                        |                |               |                       |             |                        |
| <b>Total (treatment)</b>                        |                        |                |               | <b>4530</b>           | <b>4284</b> | <b>246 (-458, 949)</b> |
|                                                 |                        |                |               |                       |             |                        |
| <b>Total (diagnosis, staging and treatment)</b> |                        |                |               | <b>6878</b>           | <b>6806</b> | <b>72 (-925, 1068)</b> |

Pathological staging of patients with non-small cell lung cancer undergoing surgery

| Pathological stage | Conventional diagnosis and staging (n=13) | EBUS-TBNA diagnosis and staging (n= 15) |
|--------------------|-------------------------------------------|-----------------------------------------|
| pT1a N0            | 2                                         | 2                                       |
| pT1a N1            |                                           |                                         |
| pT1a N2            |                                           |                                         |
| pT1b N0            |                                           | 2                                       |
| pT1b N1            | 1                                         | 1                                       |
| pT1b N2            |                                           |                                         |
| pT2a N0            | 1                                         | 4                                       |
| pT2a N1            | 3                                         | 1                                       |
| pT2a N2            |                                           | 1                                       |
| pT2b N0            |                                           | 2                                       |
| pT2b N1            |                                           |                                         |
| pT2b N2            |                                           |                                         |
| pT3 N0             | 2                                         | 1                                       |
| pT3 N1             | 1                                         |                                         |
| pT3 N2             |                                           |                                         |
| pT4 N0             | 3                                         | 1                                       |
| pT4 N1             |                                           |                                         |
| pT4 N2             |                                           |                                         |

Recruitment to Lung-BOOST

|                                    | From April 2008 | 2009 | 2010 | Until July 2011 |
|------------------------------------|-----------------|------|------|-----------------|
| University College London Hospital | 10              | 27   | 17   | 9               |
| North Middx Hospital               | 10              | 17   | 6    | 3               |
| Whittington Hospital               |                 | 4    | 13   | 7               |
| Princess Alexandra Hospital        |                 |      |      | 2               |
| Nottingham Hospital                |                 |      | 1    | 6               |
| Barnet Hospital                    |                 |      | 1    |                 |
